# Supplementary material for: Advice from the health insurer as a channelling strategy: a natural experiment at a Dutch health insurance company
Source: BMC Health Serv Res. 2018 Nov 6;18:832. doi: 10.1186/s12913-018-3624-6 (PMC6219118; doi:10.1186/s12913-018-3624-6)
Supplement: Supplementary file 1 — Appendix 1. Multilevel analyses. (XLSX 15 kb) [file 12913_2018_3624_MOESM1_ESM.xlsx]

## Sheet: MLA
Multilevel analyses
Ref. cat.: Team D						Number of obs = 7.756
Service Quality Score	Coef.	Std. Err.	z	P>z	[95% Conf.	Interval]
team_x
Pilot team	-0.253923	0.145769	-1.74	0.082	-0.539625	0.031779
Team M	-0.158487	0.134336	-1.18	0.238	-0.421781	0.104808
2.period	0.0732617	0.0867319	0.84	0.398	-0.0967296	0.243253
team_x#period
Pilot team#2	0.60935	0.12496	4.88	0	0.364433	0.854267
Team M#2	0.120515	0.12025	1	0.316	-0.11517	0.3562
_cons	7.62175	0.0977227	77.99	0	7.43022	7.81328
Random-effects Parameters	Estimate	Std. Err.	[95% Conf.	Interval]
mw: Identity
var(_cons)	0.127123	0.0300498	0.0799858	0.202039
var(Residual)	3.81211	0.0615921	3.69328	3.93476
LR test vs. linear model: chibar2(01) = 109.15 Prob >= chibar2 = 0.0000
Ref. cat.: Team M						Number of obs = 7.756
Service Quality Score	Coef.	Std. Err.	z	P>z	[95% Conf.	Interval]
team_x
Team D	0.158487	0.134336	1.18	0.238	-0.104808	0.421781
Pilot team	-0.0954367	0.139231	-0.69	0.493	-0.368325	0.177452
2.period	0.193777	0.083292	2.33	0.02	0.0305277	0.357027
team_x#period
Team D#2	-0.120515	0.12025	-1	0.316	-0.3562	0.11517
Pilot teaml#2	0.488835	0.122956	3.98	0	0.247846	0.729823
_cons	7.46327	0.0921768	80.97	0	7.2826	7.64393
Random-effects Parameters	Estimate	Std. Err.	[95% Conf.	Interval]
mw: Identity
var(_cons)	0.127123	0.0300498	0.0799858	0.202039
var(Residual)	3.81211	0.0615921	3.69328	3.93476
LR test vs. linear model: chibar2(01) = 109.15 Prob >= chibar2 = 0.0000
Ref. cat.: Pilot team						Number of obs = 7.756
Service Quality Score	Coef.	Std. Err.	z	P>z	[95% Conf.	Interval]
team_x
Team D	0.253923	0.145769	1.74	0.082	-0.031779	0.539625
Team M	0.0954367	0.139231	0.69	0.493	-0.177452	0.368325
2.period	0.682612	0.0899587	7.59	0	0.506296	0.858927
team_x#period
Team D#2	-0.60935	0.12496	-4.88	0	-0.854267	-0.364433
Team M#2	-0.488835	0.122956	-3.98	0	-0.729823	-0.247846
_cons	7.36783	0.108161	68.12	0	7.15584	7.57982
Random-effects Parameters	Estimate	Std. Err.	[95% Conf.	Interval]
mw: Identity
var(_cons)	0.127123	0.0300498	0.0799858	0.202039
var(Residual)	3.81211	0.0615921	3.69328	3.93476
LR test vs. linear model: chibar2(01) = 109.15 Prob >= chibar2 = 0.0000

## Sheet: MLA subset
Multilevel analyses on subset
Ref. cat.: Team D						Number of obs = 2,791
Service Quality Score	Coef.	Std. Err.	z	P>z	[95% Conf.	Interval]
team_x
Pilot team	-0.159206	0.177109	-0.9	0.369	-0.506334	0.187921
Team M	-0.293083	0.171586	-1.71	0.088	-0.629386	0.0432196
2.period	-0.0747817	0.128527	-0.58	0.561	-0.32669	0.177126
team_x#period
Pilot team#2	0.535296	0.179317	2.99	0.003	0.18384	0.88675
Team M#2	0.305107	0.179868	1.7	0.09	-0.0474284	0.657642
_cons	7.98004	0.124117	64.29	0	7.73677	8.2233
Random-effects Parameters	Estimate	Std. Err.	[95% Conf.	Interval]
mw: Identity
var(_cons)	0.0788483	0.0286329	0.038698	0.160656
var(Residual)	2.72626	0.0740925	2.58484	2.87542
LR test vs. linear model: chibar2(01) = 24.45 Prob >= chibar2 = 0.0000
Ref. cat.: Team M						Number of obs = 2,791
Service Quality Score	Coef.	Std. Err.	z	P>z	[95% Conf.	Interval]
team_x
Team D	0.293083	0.171586	1.71	0.088	-0.0432196	0.629386
Pilot team	0.133877	0.171832	0.78	0.436	-0.202909	0.470662
2.period	0.230325	0.125831	1.83	0.067	-0.0162989	0.476949
team_x#period
Team D#2	-0.305107	0.179868	-1.7	0.09	-0.657642	0.0474284
Pilot team#2	0.230189	0.178292	1.29	0.197	-0.119258	0.579635
_cons	7.68696	0.118477	64.88	0	7.45474	7.91917
Random-effects Parameters	Estimate	Std. Err.	[95% Conf.	Interval]
mw: Identity
var(_cons)	0.0788483	0.0286329	0.038698	0.160656
var(Residual)	2.72626	0.0740925	2.58484	2.87542
LR test vs. linear model: chibar2(01) = 24.45 Prob >= chibar2 = 0.0000
Ref. cat.: Pilotteam						Number of obs = 2,791
Service Quality Score	Coef.	Std. Err.	z	P>z	[95% Conf.	Interval]
team_x
Team D	0.159206	0.177109	0.9	0.369	-0.187921	0.506334
Team M	-0.133877	0.171832	-0.78	0.436	-0.470662	0.202909
2.period	0.460514	0.125042	3.68	0	0.215436	0.705591
team_x#period
Team D#2	-0.535296	0.179317	-2.99	0.003	-0.88675	-0.18384
Team M#2	-0.230189	0.178292	-1.29	0.197	-0.579635	0.119258
_cons	7.82083	0.126343	61.9	0	7.5732	8.06846
Random-effects Parameters	Estimate	Std. Err.	[95% Conf.	Interval]
mw: Identity
var(_cons)	0.0788483	0.0286329	0.038698	0.160656
var(Residual)	2.72626	0.0740925	2.58484	2.87542
LR test vs. linear model: chibar2(01) = 24.45 Prob >= chibar2 = 0.0000
